# Supplementary material for: Novel Indole-based Tambjamine-Analogues Induce Apoptotic Lung Cancer Cell Death through p38 Mitogen-Activated Protein Kinase Activation
Source: Oxford University Press journal article supplement (doi:10.1158/1535-7163.mct-16-0752), 2017-04-10
Supplement: 15357163mct160752-sup-174297_2_supp_3913851_gmwnsc.xls [file 15357163mct160752-sup-174297_2_supp_3913851_gmwnsc.xls]

## Sheet: Sheet1
	A549 DMSO 6h	A549 Tambjamine 1 6h	A549 Tambjamine 2 6h	A549 DMSO 16h	A549 Tambjamine 1 16h	A549 Tambjamine 2 16h		SW900 DMSO 6h	SW900 Tambjamine 1 6h	SW900 Tambjamine 2 6h	SW900 DMSO 16h	SW900 Tambjamine 1 16h	SW900 Tambjamine 2 16h
A01	20.9546	21.3303	20.818	20.6262	21.6297	21.4662	A01	21.9521	22.7119	23.0705	22.673	23.6021	23.1387
A02	21.6567	22.4233	21.4928	21.5185	22.0172	21.7386	A02	20.1951	20.919	21.2751	20.5605	21.6534	21.5996
A03	20.5309	21.3068	20.219	20.4954	21.1633	20.4011	A03	20.2117	20.743	21.135	20.6891	21.2879	20.9525
A04	22.3151	22.1122	20.6588	22.2327	22.6208	21.5573	A04	21.2805	20.6851	21.2595	21.5321	21.7096	21.4683
A05	20.5373	22.1084	20.9758	20.6549	22.2152	21.778	A05	19.6128	20.8388	21.4211	20.2904	21.7662	21.7003
A06	20.9295	22.1281	21.3654	21.186	22.7826	22.5914	A06	20.1513	20.7538	21.6694	20.5943	22.3706	22.495
A07	28.9177	29.5824	29.8836	28.9621	29.6337	28.4087	A07	27.4209	27.8345	27.8834	28.4896	27.4506	27.1629
A08	28.01	29.3554	28.3341	28.1964	28.3715	28.245	A08	26.9915	28.5063	28.8063	27.4026	28.1375	27.8999
A09	23.6642	24.9518	24.6137	23.5998	25.1601	25.3224	A09	23.711	24.8153	25.588	24.5915	25.7759	25.8856
A10	24.9783	26.4114	26.0095	24.7027	25.8249	26.156	A10	22.8103	25.0295	25.8511	23.6282	24.8073	24.9459
A11	20.2235	21.428	20.7482	20.1264	21.8785	21.7295	A11	18.9426	20.38	20.6736	19.3295	21.2883	21.3584
A12	22.6343	23.7226	22.2317	22.6263	23.7332	23.562	A12	21.1461	22.7089	22.8836	21.6285	23.1925	23.3608
B01	21.1347	21.7558	20.4349	20.8547	21.3525	20.5274	B01	19.8857	20.5113	20.7827	20.9009	20.95	20.6425
B02	23.4039	24.2961	23.4329	23.3336	23.6983	23.5674	B02	22.6286	23.6196	23.8134	23.1493	23.4459	23.2765
B03	22.9059	22.5711	21.7621	22.7991	23.1926	22.4257	B03	21.9793	21.9476	21.9446	22.4707	22.3418	22.0819
B04	24.2299	24.7765	23.7079	24.3963	24.883	24.6897	B04	23.4326	24.0002	24.256	24.6467	24.3802	23.9074
B05	22.8065	22.7476	21.2845	22.3522	22.0011	21.6249	B05	21.5962	22.418	22.6707	22.2435	22.6389	22.5768
B06	22.6238	23.3138	21.825	22.6823	22.7493	21.926	B06	21.5276	21.4661	22.1114	22.2933	22.6755	22.3715
B07	19.9694	20.4071	19.4015	20.1521	20.1319	19.2818	B07	17.4824	17.8335	17.9688	17.8116	18.1873	17.8977
B08	18.6902	18.5418	17.5216	18.8764	18.2476	17.6081	B08	20.8807	20.6556	20.6337	21.5027	20.7734	20.4427
B09	23.9341	23.8572	23.098	24.2933	23.1811	23.227	B09	23.2241	23.5319	23.7581	24.2092	23.793	23.2699
B10	20.5671	20.2581	19.1524	20.3686	20.8905	19.91	B10	20.2489	19.9759	19.9326	21.2447	21.347	21.2676
B11	24.3136	25.1075	23.5522	24.1955	24.7081	24.236	B11	23.8678	25.0189	25.5848	24.6805	25.4651	25.483
B12	26.9189	28.4205	28.6225	27.1389	27.8863	28.1778	B12	25.4836	27.1975	27.7294	26.152	26.709	26.4915
C01	39.9209	Undetermined	Undetermined	Undetermined	Undetermined	Undetermined	C01	30.4064	30.7586	31.2389	32.7815	33.8822	31.5775
C02	30.4927	34.9628	30.6906	29.9659	33.2347	31.1552	C02	30.4738	30.3337	34.8816	34.9841	34.5124	34.385
C03	32.4101	33.3612	32.6272	31.2318	31.8137	32.716	C03	27.6554	29.7333	31.6037	29.1834	29.5052	29.3053
C04	28.5272	29.9256	29.1917	27.9752	29.0085	29.6258	C04	30.2877	28.725	29.9726	30.4602	30.3183	29.7955
C05	Undetermined	Undetermined	Undetermined	Undetermined	Undetermined	Undetermined	C05	30.2953	30.2317	30.84	30.5088	30.9941	31.6632
C06	26.8522	27.6171	27.3287	26.8578	27.3747	26.9951	C06	23.8159	25.6443	26.1561	24.4152	25.5065	25.3389
C07	23.0044	23.4469	22.2545	22.9292	23.7007	22.5887	C07	21.7339	22.6154	23.13	22.5284	23.6281	22.8142
C08	17.8222	18.3595	17.8442	17.5807	18.0133	17.948	C08	17.2666	18.1647	18.2595	17.8598	18.4091	18.0292
C09	22.2355	23.2647	22.0025	22.2283	22.6135	22.7114	C09	20.257	21.1656	21.4861	20.4586	21.5133	21.2468
C10	26.1976	26.0075	24.638	25.8818	26.1003	25.3907	C10	24.7926	25.5907	25.7605	25.4041	26.3202	25.6081
C11	21.2744	22.298	21.3657	21.4514	21.8861	21.7891	C11	20.1809	21.1531	21.6045	21.2059	21.8673	21.5106
C12	23.0125	23.6471	22.3507	22.688	23.5124	22.6848	C12	23.3905	23.6966	23.8868	22.9088	23.8451	23.481
D01	23.3397	24.1879	23.4125	23.0151	23.7991	23.5905	D01	23.3143	24.3369	24.476	23.6836	24.4151	24.1497
D02	23.6699	24.5007	22.7242	23.8202	23.8055	22.9666	D02	23.616	23.7372	23.9237	23.9137	24.2414	23.506
D03	22.7639	23.3808	21.8173	22.7395	23.3839	22.5341	D03	21.8474	22.1338	22.5725	21.9195	23.219	22.5839
D04	23.3587	24.4923	23.4918	23.8306	23.9914	23.7787	D04	23.5647	24.6023	25.2519	24.1266	24.5158	24.3385
D05	19.8402	19.9123	18.7706	19.823	20.504	20.016	D05	19.5894	19.4763	19.8285	20.2927	20.5614	20.4505
D06	21.7088	22.4511	21.6617	21.6623	22.3041	21.9031	D06	22.5649	23.8416	23.8938	23.2045	23.7119	23.3233
D07	17.4841	18.5909	17.5449	17.4143	18.4226	18.3087	D07	16.7922	17.7728	18.2487	17.4254	18.2708	17.9123
D08	18.3625	17.5895	17.366	17.9934	17.3427	17.1308	D08	17.5284	16.4633	16.9723	18.2539	16.7502	16.3577
D09	29.9952	32.5151	31.3301	30.5602	37.5332	39.8813	D09	29.8258	30.6854	34.6282	31.2665	32.74	31.2988
D10	21.1867	21.4918	20.6358	21.3291	21.5464	20.9447	D10	22.8001	23.7891	23.9356	23.5714	24.6235	24.4946
D11	30.6013	32.5652	30.8728	31.1127	31.8614	31.116	D11	28.2376	28.6353	29.6901	30.2077	30.5564	29.4978
D12	25.2821	25.28	23.9987	25.4079	25.4024	24.3764	D12	25.9904	25.6956	26.0121	26.816	25.9376	25.4902
E01	32.6743	36.9191	34.9678	31.9038	36.8193	39.5612	E01	25.682	26.2765	27.2114	25.7719	27.4234	27.586
E02	35.5131	Undetermined	34.7591	34.7166	38.7724	37.2863	E02	27.3491	30.4399	30.9172	27.487	30.7956	31.2121
E03	22.9075	23.9842	22.287	22.9768	23.7729	23.2974	E03	20.7223	21.1358	21.5788	21.3159	21.8998	21.6165
E04	21.5901	22.5679	21.2573	21.6364	22.4	21.1348	E04	20.9749	21.8636	21.9968	21.6746	22.1689	21.7117
E05	24.4294	24.3644	23.5372	23.7904	24.9536	23.5174	E05	22.9266	22.6718	23.8711	23.6899	23.5022	23.1871
E06	22.7972	23.4046	22.7415	22.7935	23.3662	22.8255	E06	22.27	22.7875	23.1669	22.8095	22.7987	22.3175
E07	24.1856	22.4588	20.8517	23.924	23.9427	22.8898	E07	22.5801	23.0005	23.5069	23.5801	24.1716	23.8019
E08	22.4541	22.855	21.2599	22.4407	22.77	21.5575	E08	21.2836	21.7717	22.219	21.68	22.2619	21.7807
E09	28.8278	29.9166	29.4798	28.2908	29.6806	28.1918	E09	26.7	28.3892	29.2588	27.8214	28.648	28.3704
E10	22.2906	23.2896	21.7199	22.3154	22.8631	22.3847	E10	20.2879	21.5184	22.0241	20.8021	21.753	21.6905
E11	22.953	23.5445	23.2035	22.9453	23.9592	23.5112	E11	22.7705	23.2737	23.8193	23.1969	23.4797	22.1911
E12	22.541	22.7687	21.7732	22.4563	22.9729	22.4118	E12	21.2975	21.5515	21.9707	22.1316	22.6185	21.946
F01	28.7735	30.832	29.4363	29.6266	30.606	30.6713	F01	28.9816	29.8259	30.2955	29.2517	30.5138	30.3563
F02	31.9922	39.4232	37.9582	34.9003	34.1205	33.2185	F02	30.8604	29.2728	29.2526	29.643	30.6194	30.4877
F03	35.8037	Undetermined	33.9251	36.3974	Undetermined	39.238	F03	31.8068	31.2229	33.4046	33.735	30.2076	30.7543
F04	22.8188	22.968	22.3532	22.8379	23.2016	22.9812	F04	22.8928	23.3849	23.3991	23.7045	23.242	23.5431
F05	24.1862	24.6613	23.6064	24.3653	24.8741	24.4097	F05	23.7974	24.3372	24.7842	24.687	24.6164	24.435
F06	24.2684	24.5206	23.3666	23.9538	24.4992	23.9788	F06	22.6459	22.9394	23.6781	23.3676	23.553	23.8003
F07	20.8071	22.2	21.4816	21.0422	22.6533	22.4154	F07	20.5126	21.7644	22.3685	20.7591	22.6305	22.2274
F08	20.3925	20.3824	18.9739	20.4261	20.8785	20.1128	F08	19.6147	20.26	20.4826	20.677	21.7932	21.6148
F09	24.975	24.6278	24.2047	25.1859	25.6103	24.2804	F09	24.9488	24.9197	24.5079	26.3349	25.3951	24.7883
F10	23.6947	24.3724	23.5965	23.836	25.4793	24.4056	F10	22.767	23.9065	24.3977	23.0909	24.6064	24.6544
F11	21.5422	21.7893	21.4181	21.557	21.8561	21.4424	F11	20.1077	20.6156	21.2923	20.6785	21.6473	21.2137
F12	29.882	32.4036	31.7571	31.7083	32.497	31.1934	F12	32.3135	32.1622	34.6926	33.6534	34.8006	34.7462
G01	24.4018	24.5779	23.72	24.6377	25.331	24.7353	G01	23.938	23.4552	24.493	24.8458	24.5363	23.9937
G02	25.5692	25.1952	24.3605	25.8728	26.2455	24.4558	G02	25.2471	24.6965	24.4632	25.9827	25.2906	26.5737
G03	23.6617	21.2	19.4223	23.9282	24.545	22.3039	G03	20.7343	19.6334	19.6385	21.6334	21.7222	21.3273
G04	19.526	19.9441	19.2926	19.4224	19.9647	19.6478	G04	19.2016	19.649	19.8862	19.6353	19.967	19.7372
G05	20.7195	21.6297	20.4963	20.9417	21.1919	20.2051	G05	19.8936	20.6296	20.282	20.8019	21.2929	20.8359
G06	28.6498	29.1676	27.9489	28.2122	29.0994	28.6686	G06	30.5798	33.2782	33.6152	31.7308	34.8816	32.8921
G07	23.4226	23.4672	22.2688	23.3724	23.792	22.7322	G07	23.132	23.2679	22.9995	23.693	23.5352	23.32
G08	18.8787	20.1535	19.541	18.9483	20.7344	20.725	G08	19.7007	20.7771	21.3129	19.76	21.9815	22.0045
G09	20.956	21.4758	20.7977	20.8155	21.5357	21.5705	G09	21.3416	21.6392	21.9299	21.9274	22.3603	21.8798
G10	20.5228	21.2342	19.946	20.6344	20.9341	19.8612	G10	24.1987	23.9664	24.4002	24.3719	24.5496	24.3411
G11	17.5015	18.1477	17.6762	17.4278	17.8295	17.6586	G11	18.603	19.0059	18.9232	19.2644	18.8944	18.5482
G12	18.9852	19.2291	17.3584	19.1526	19.8539	18.5181	G12	18.8419	17.8435	17.7385	19.7477	18.8861	18.1946
H01	14.647	15.5111	14.428	14.7436	15.3117	14.7536	H01	13.7911	14.6679	14.9782	14.409	15.5997	15.6224
H02	19.951	20.106	19.536	19.9112	20.2675	19.7	H02	17.1656	17.7814	18.2458	17.6358	17.9629	17.8477
H03	16.4258	16.8327	15.7302	16.2651	16.7344	16.1584	H03	14.9557	15.7731	15.964	15.438	15.9751	15.7669
H04	21.8789	22.3494	21.6928	21.684	22.5029	22.263	H04	21.0132	21.8034	22.1877	20.9443	22.5308	22.3933
H05	15.7095	16.0135	15.4128	15.6144	15.8841	15.4441	H05	14.6573	15.0272	15.1644	15.2264	15.2686	15.1408
H06	37.9654	Undetermined	Undetermined	37.6648	Undetermined	Undetermined	H06	39.5009	38.3847	Undetermined	Undetermined	Undetermined	Undetermined
H07	27.4675	27.6384	25.4545	26.8115	27.5556	25.1567	H07	25.1177	25.2994	25.8945	25.8364	26.3031	25.817
H08	27.145	27.6019	25.3664	25.9026	27.2214	25.1712	H08	24.9683	25.356	25.9822	25.7109	26.243	25.5007
H09	27.0814	27.5407	25.3889	26.9327	27.4641	25.3719	H09	24.92	25.5848	26.1136	23.4429	26.1264	25.5857
H10	18.4188	18.634	18.6032	18.5042	18.6401	18.5891	H10	18.1839	18.1866	18.9183	18.8853	18.6543	18.9719
H11	18.3358	18.6787	18.4678	18.5097	18.654	18.3898	H11	18.4646	18.1996	18.9489	18.7004	18.4402	18.8175
H12	18.2603	18.7325	18.3809	18.2446	18.7174	18.726	H12	18.3796	18.1852	18.7986	18.7927	18.6701	18.9758
